# Supplementary material
Source: Royal Society of Chemistry journal article supplement (doi:10.1039/d5ta10586b)
Supplement: d5ta10586b1.pdf [file d5ta10586b1.pdf]

## Supporting Information

### **Dual Functions of Lewis Acid-Base Synergy and ZnSe-CoSe<sub>2</sub> Heterojunctions toward Stable Solid-State Lithium–Sulfur Batteries**

Jiafeng He<sup>1</sup>, Shanxing Wang<sup>2\*</sup>, Leiping Liao<sup>1</sup>, and Yuanfu Deng<sup>1,3\*</sup>

<sup>1</sup> The Key Laboratory of Fuel Cell for Guangdong Province, School of Chemistry and Chemical Engineering, South China University of Technology, Guangzhou 510640, China

<sup>2</sup> School of Chemistry and Materials Engineering, Huizhou University, Huizhou 516007, China. E-mail: chsxwang@hzu.edu.cn

<sup>3</sup> Electrochemical Energy Engineering Research Centre of Guangdong Province, South China University of Technology, Guangzhou 510640, China

\* Corresponding authors: Yuanfu Deng

E-mail addresses: [chyfdeng@scut.edu.cn](mailto:chyfdeng@scut.edu.cn)

## Supporting Figures and Tables

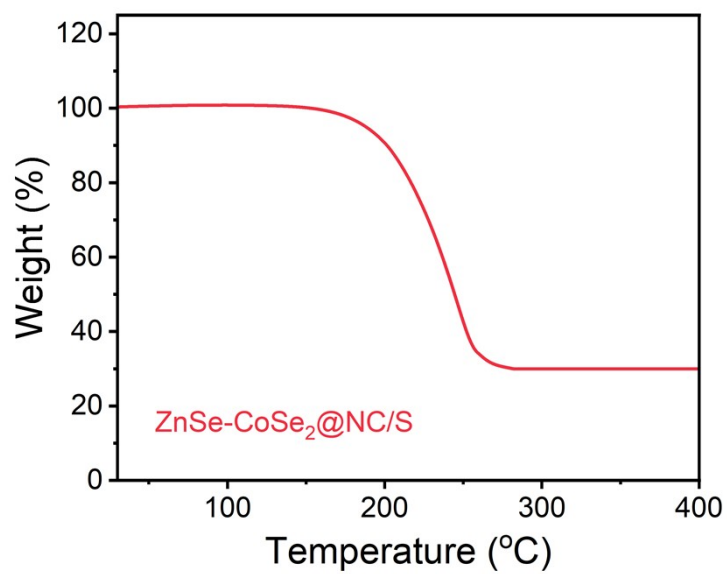

**Figure S1.** Thermogravimetric analysis curve of the ZnSe-CoSe<sub>2</sub>@NC/S composite.

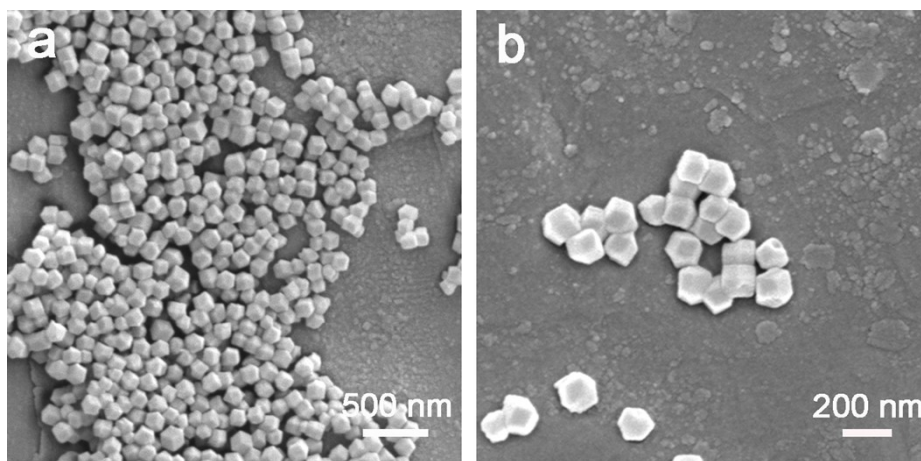

**Figure S2.** SEM image of ZIF-8 particles.

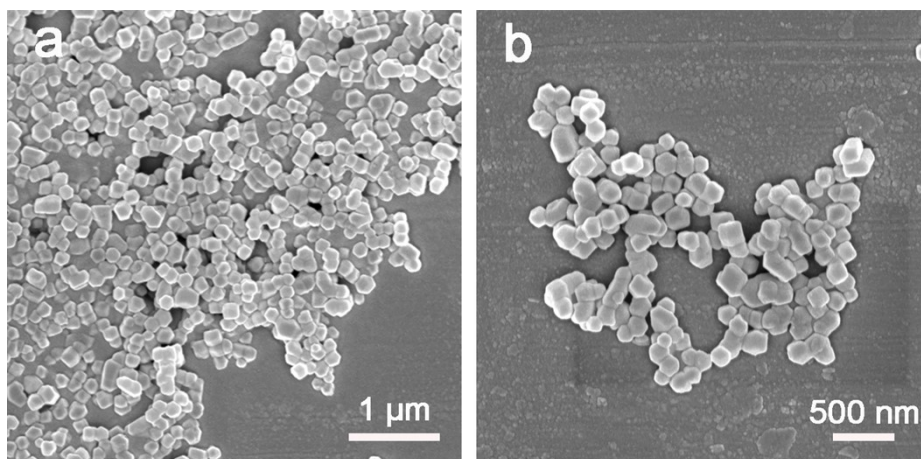

**Figure S3.** SEM mapping of ZIF-8-ZIF-67.

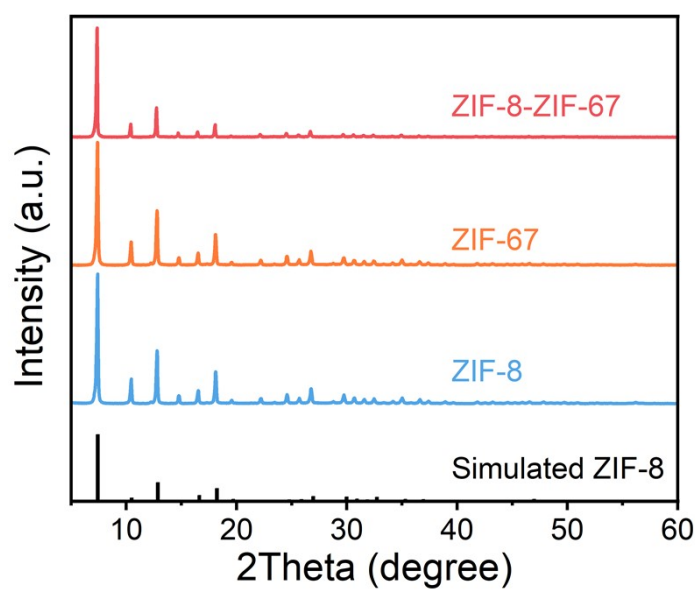

**Figure S4.** XRD patterns of ZIF-8 and ZIF-8@ZIF-67.

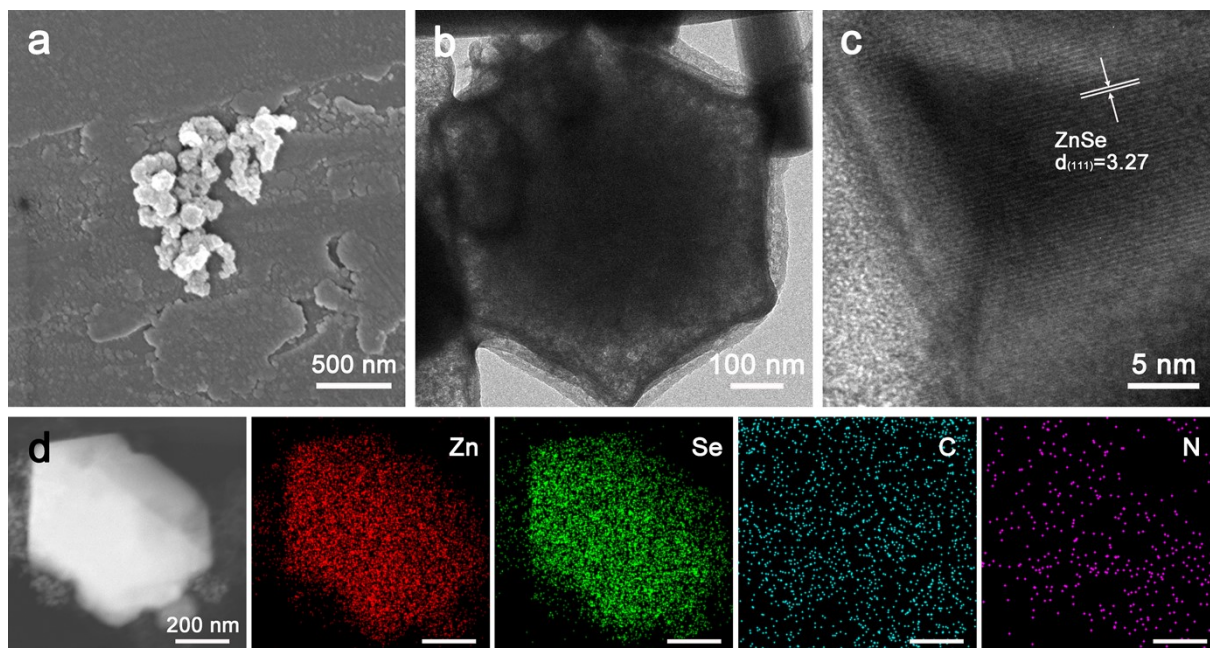

**Figure S5.** (a) FESEM, (b) TEM, and (c) HRTEM images of ZnSe@NC. (d) HAADF-STEM image and corresponding EDS elemental mapping of Zn, Se, C, and N.

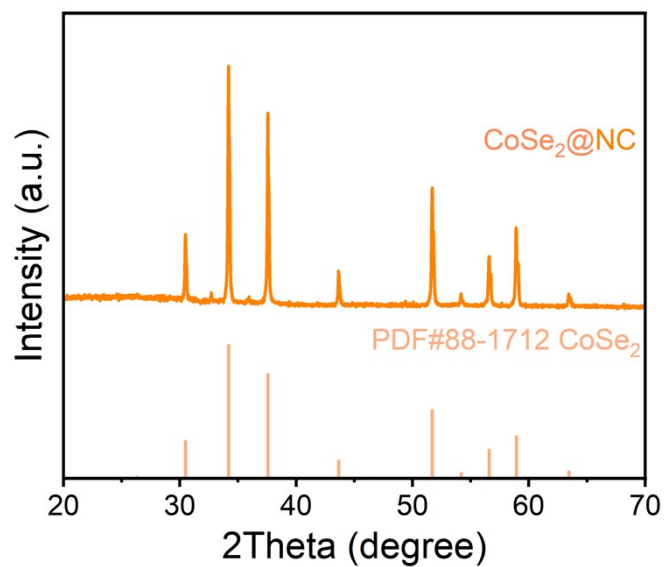

**Figure S6.** XRD pattern of CoSe<sub>2</sub>@NC.

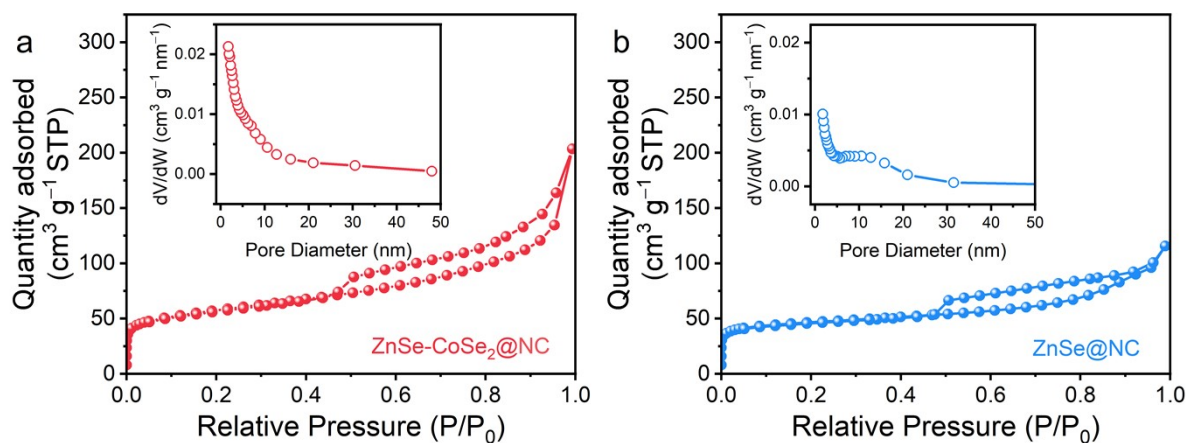

**Figure S7.**  $N_2$  adsorption-desorption isotherms and pore-size distribution curves (inset) of (a) ZnSe-CoSe<sub>2</sub>@NC and (b) ZnSe@NC.

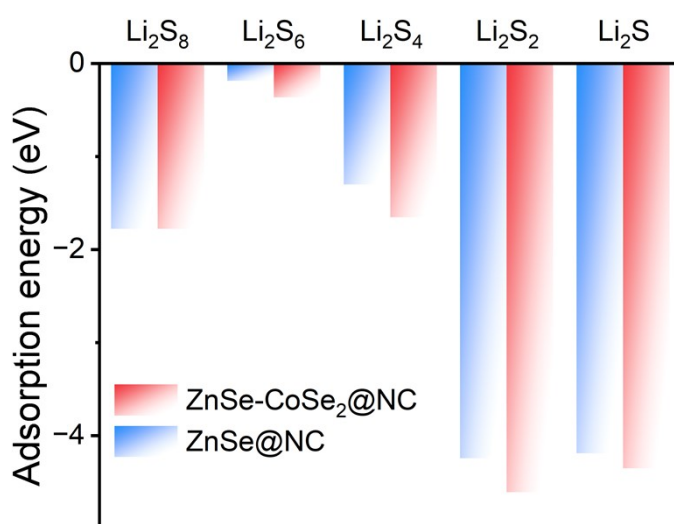

**Figure S8.** Adsorption energy of ZnSe-CoSe<sub>2</sub>@NC and ZnSe@NC with LiPSs.

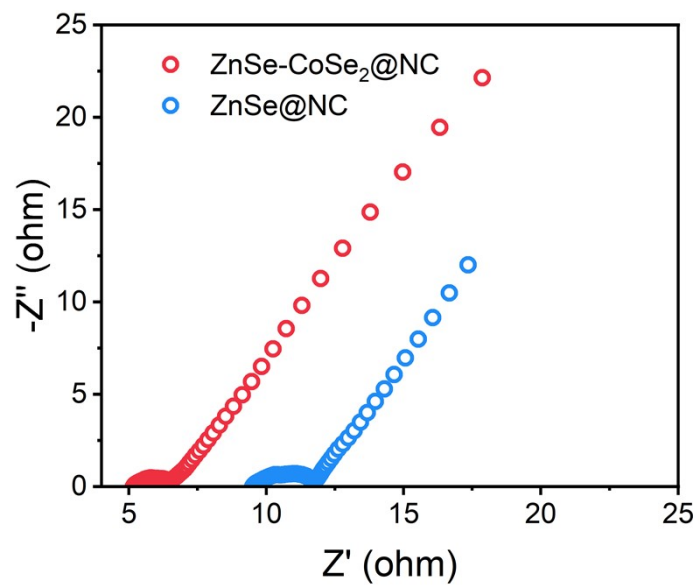

**Figure S9.** Nyquist plots of symmetric batteries.

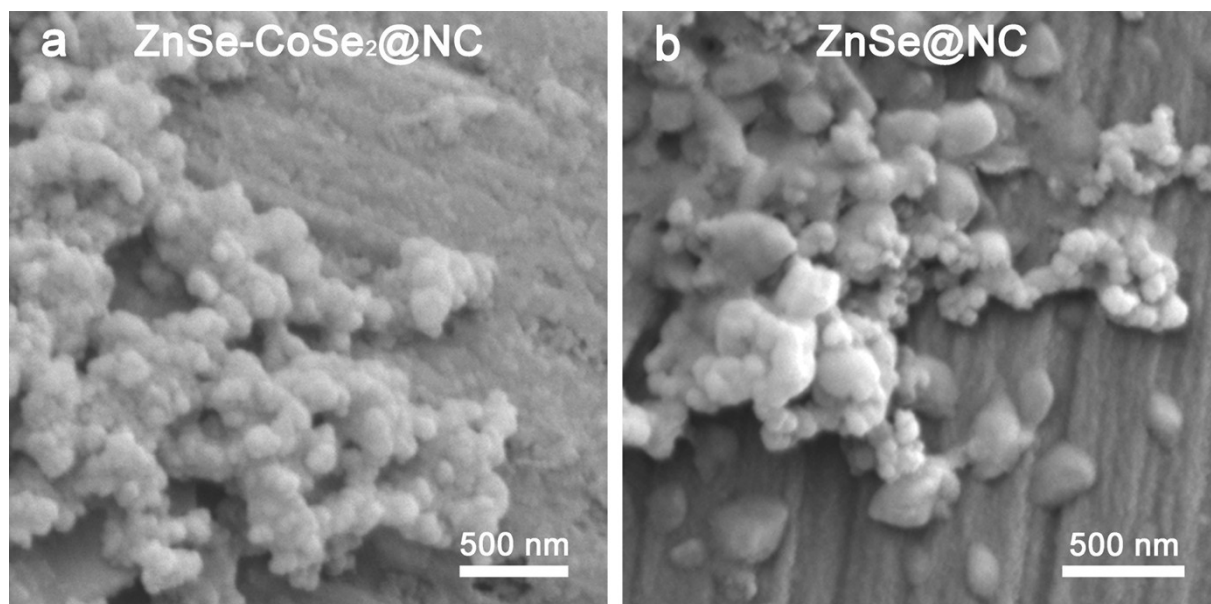

**Figure S10.** SEM images of (a)  $\text{ZnSe-CoSe}_2@NC$  and (b)  $\text{ZnSe}@NC$  after  $\text{Li}_2\text{S}$  deposition.

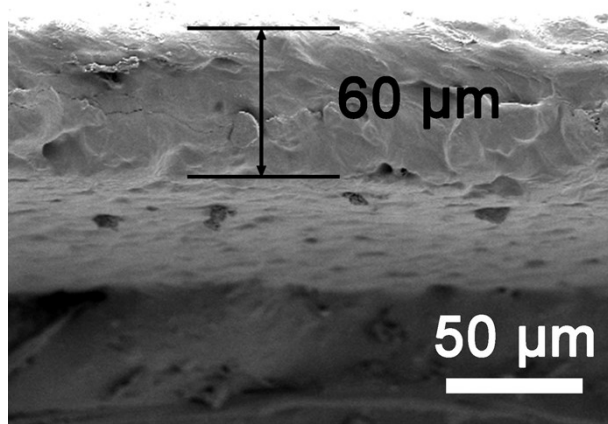

**Figure S11.** The cross-sectional SEM image of the PVDF-LLZTO film.

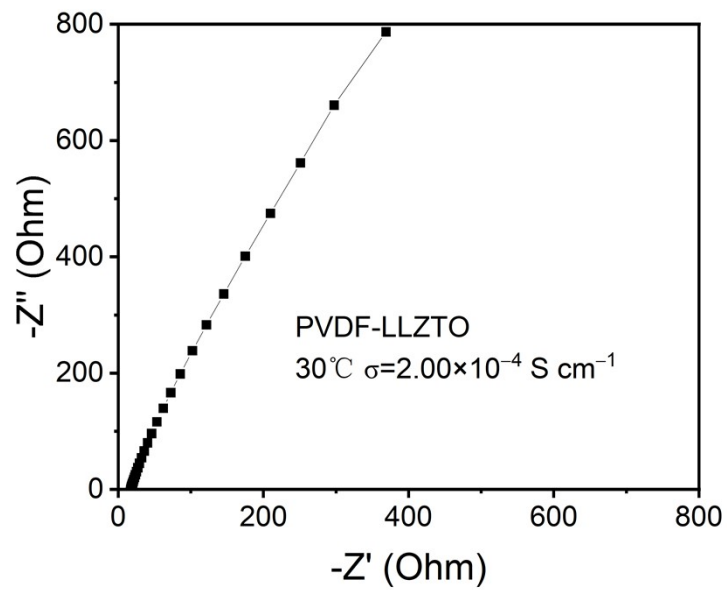

**Figure S12.** Nyquist plots of PVDF-LLZTO solid-state electrolyte.

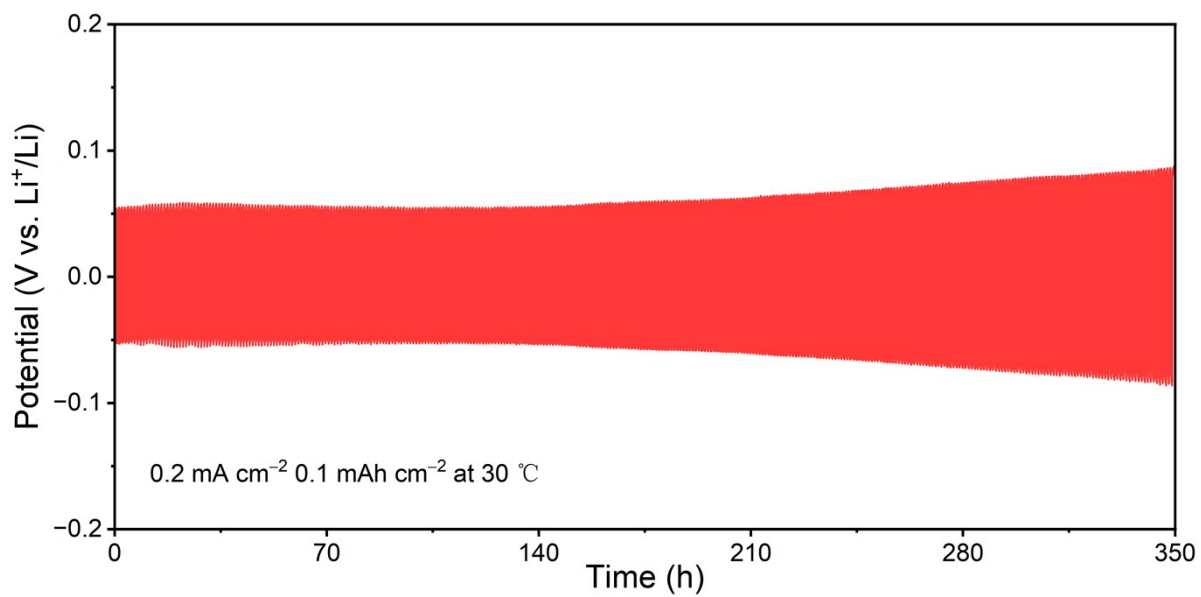

**Figure S13.** Cycling stability of a Li/ PVDF-LLZTO /Li symmetric cell at 0.1 mA cm<sup>-2</sup> at 30 °C.

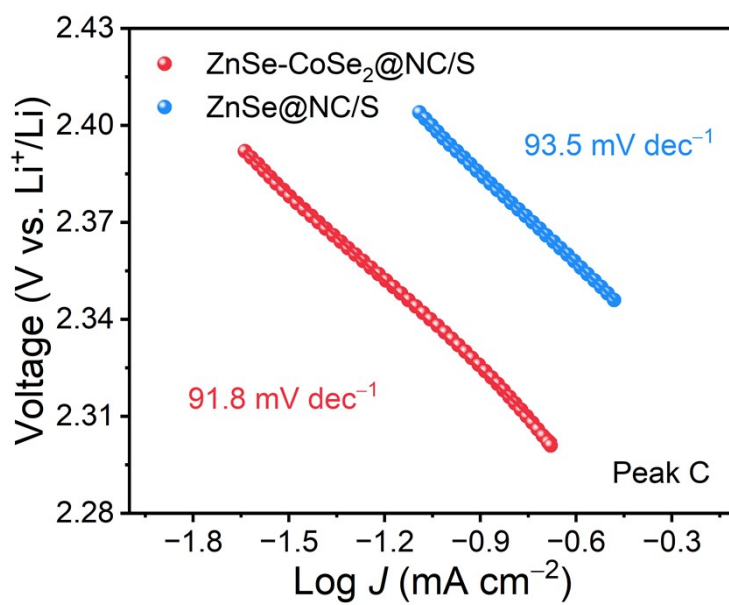

**Figure S14.** Tafel slopes determined from peak C in Figure 3a.

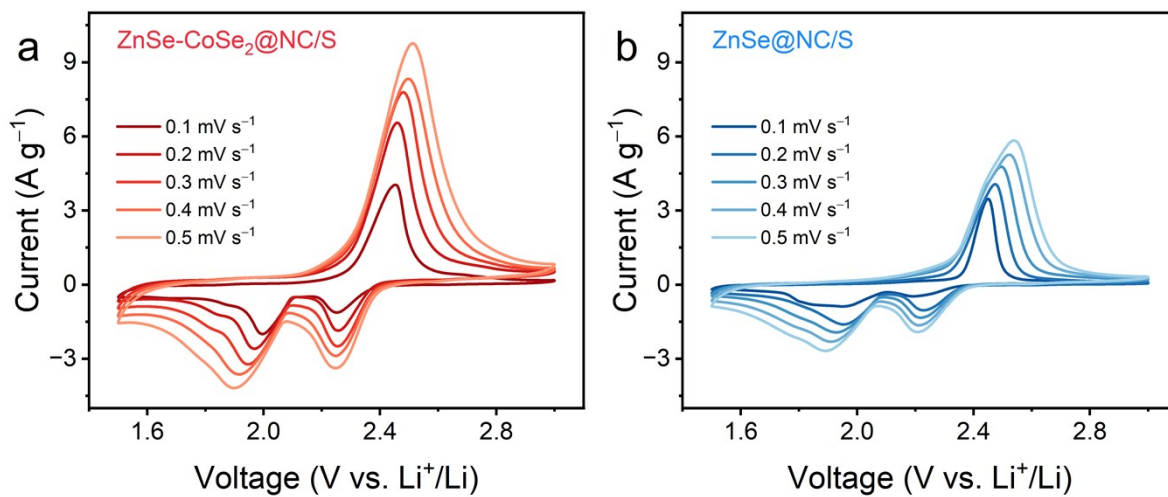

**Figure S15.** CV curves of (a) ZnSe-CoSe<sub>2</sub>@NC/S and (b) ZnSe@NC/S electrodes at various scan rates.

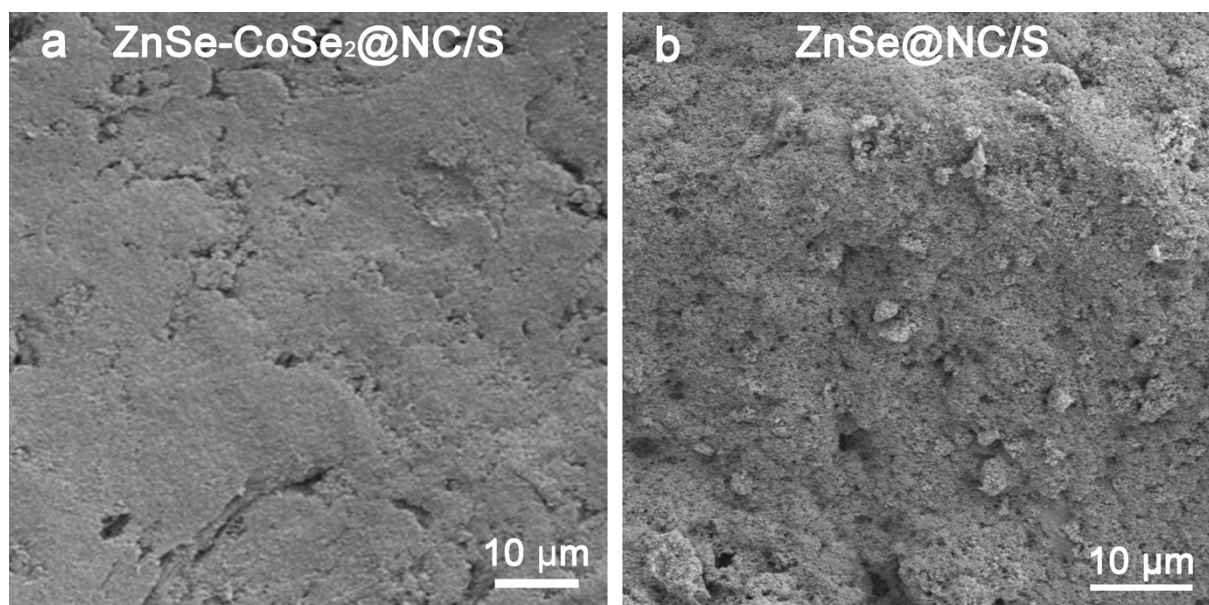

**Figure S16.** FESEM images of (a) ZnSe-CoSe<sub>2</sub>@NC/S and (b) ZnSe@NC/S electrodes.

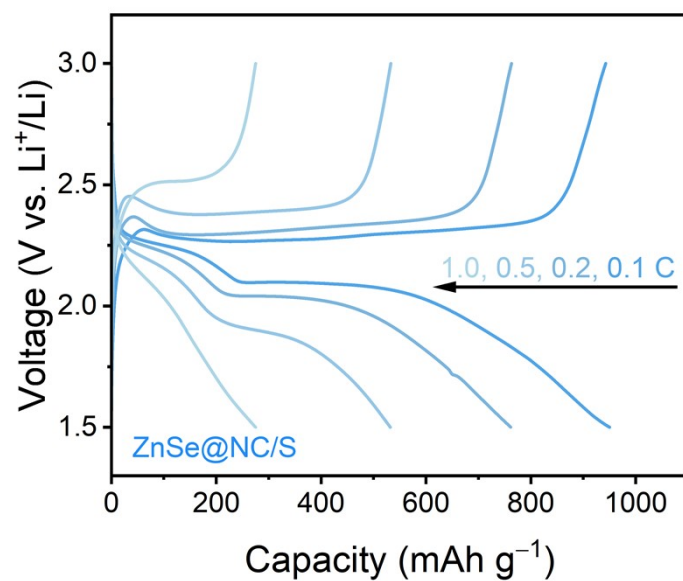

**Figure S17.** GCD curves of the ZnSe@NC/S electrode at various rates.

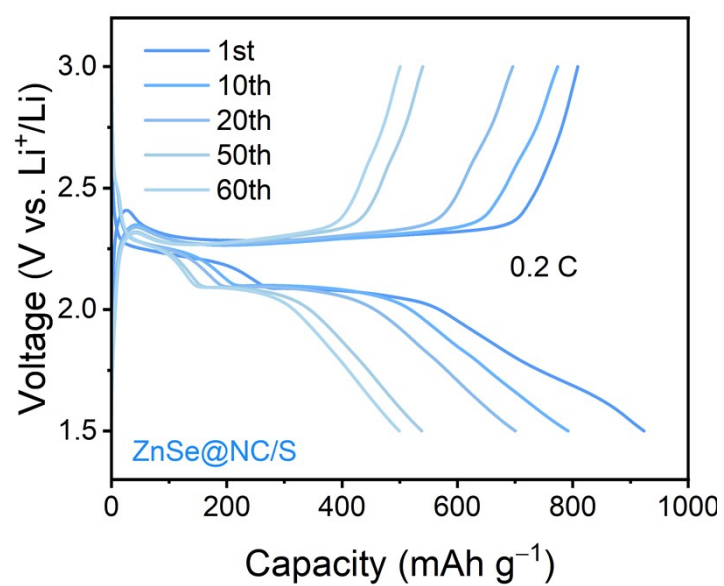

**Figure S18.** GCD curves of the ZnSe@NC/S electrode at 0.2 C.

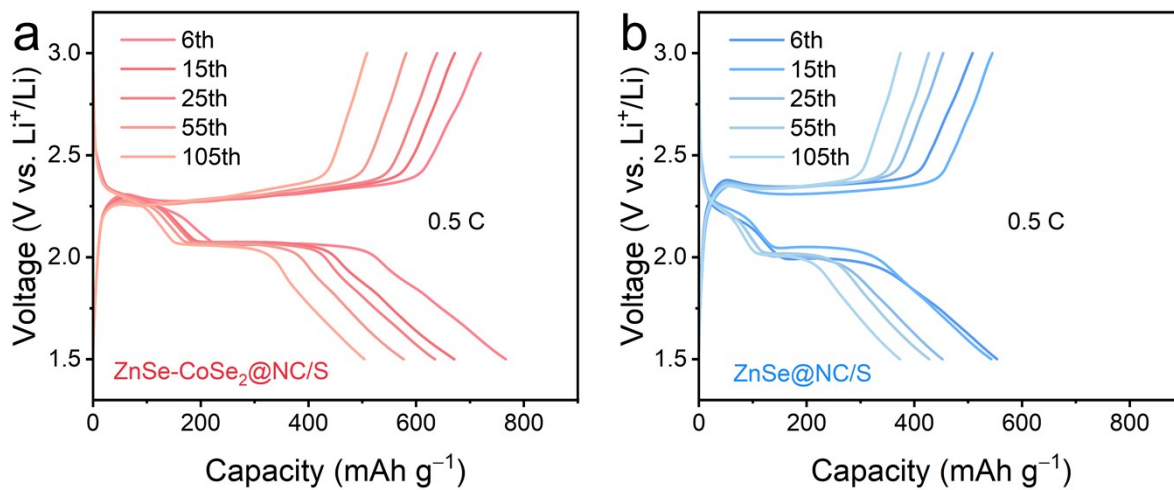

**Figure S19.** GCD curves of the (a) ZnSe-CoSe<sub>2</sub>@NC/S and (b) ZnSe@NC/S electrodes at 0.5

C.

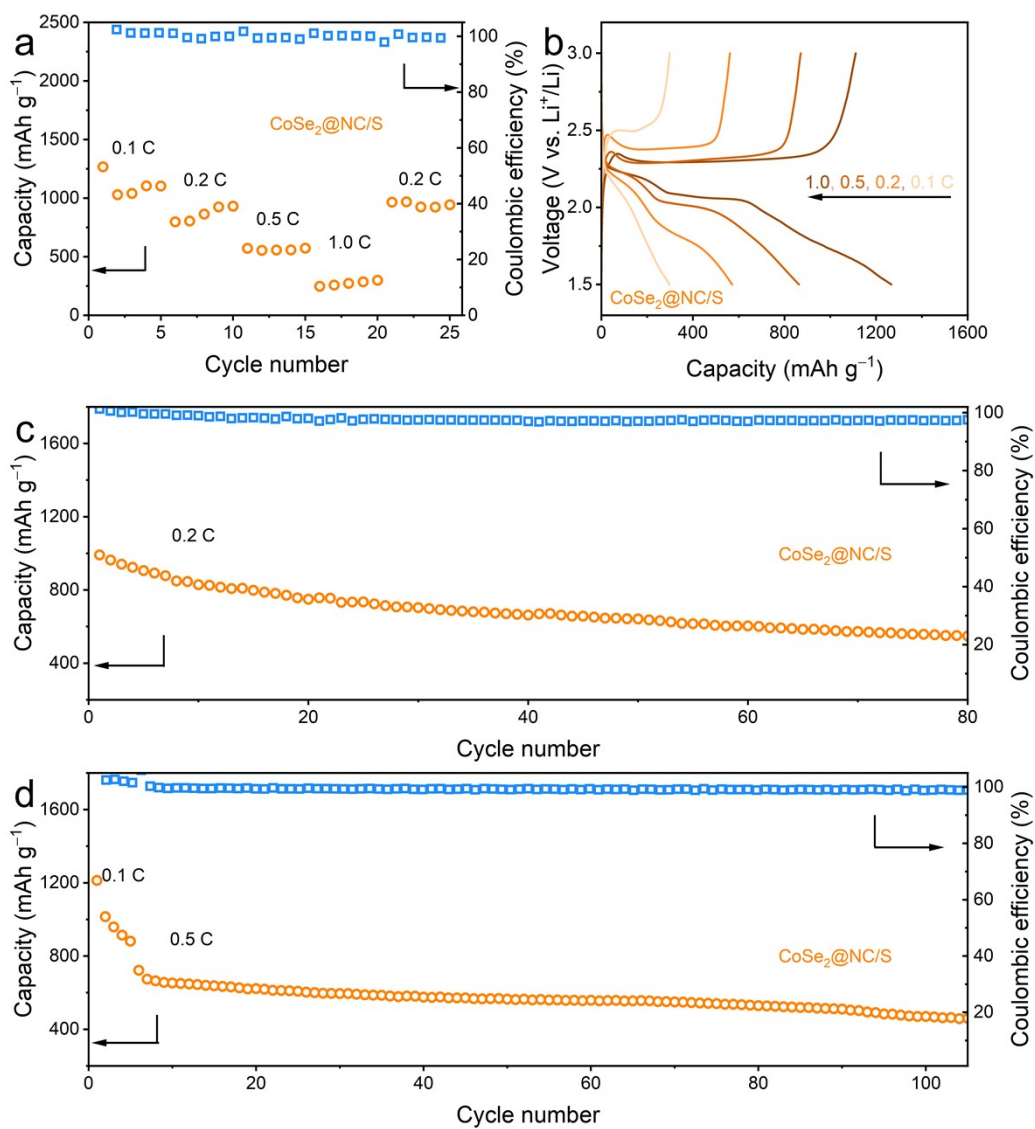

**Figure S20.** (a) Rate capability, (b) GCD profiles measured at various rates, long-term cycling performance at (c) 0.2 C and (d) 0.5 C of CoSe<sub>2</sub>@NC/S electrode.

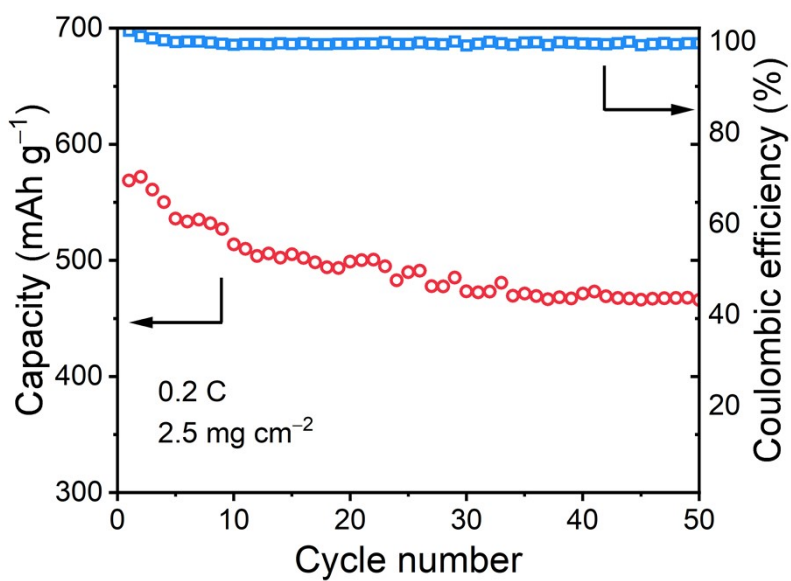

**Figure S21.** Cycling performance of high-sulfur-loading SSLSB with ZnSe-CoSe<sub>2</sub>@NC/S electrode at 0.2 C.

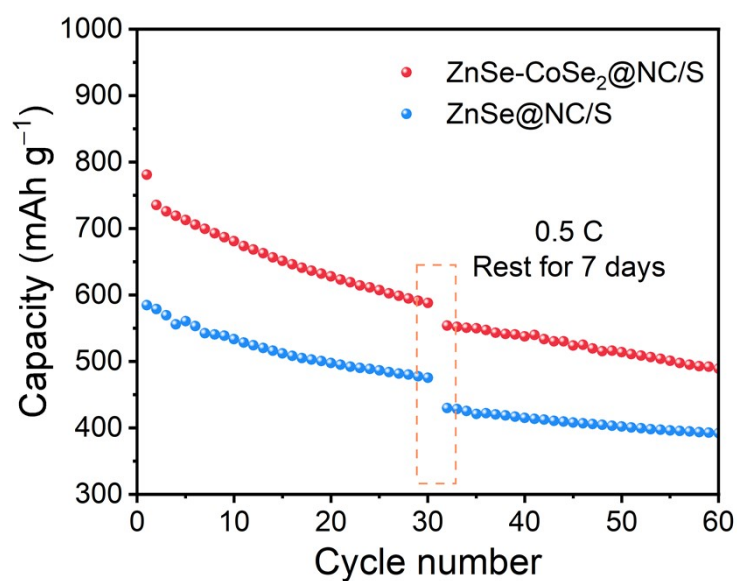

**Figure S22.** Cycling performance of the SSLSBs at 0.5 C containing an interruption rest for 7 days.

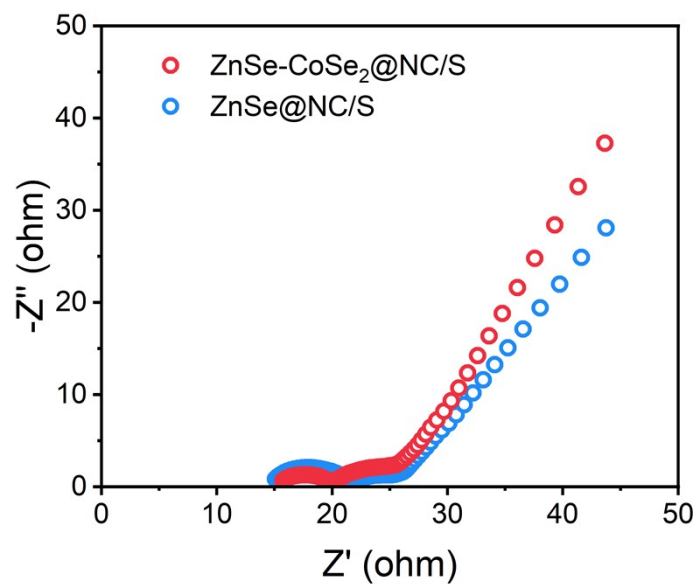

**Figure S23.** EIS Nyquist plots of SSLSBs assembled with ZnSe-CoSe<sub>2</sub>@NC/S and ZnSe@NC/S electrodes after cycling.

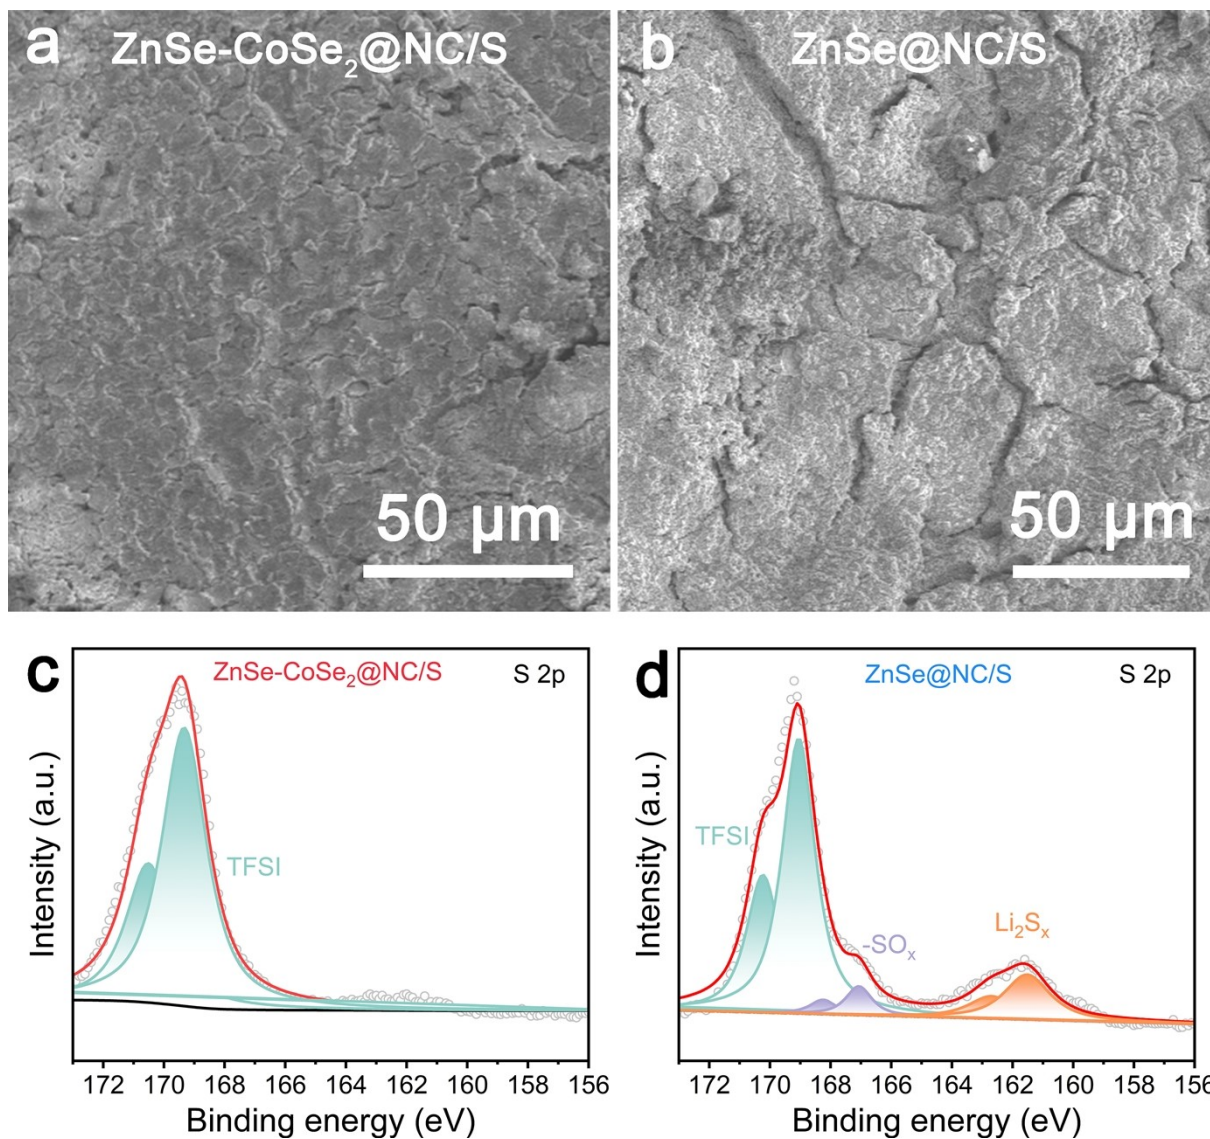

**Figure S24.** FESEM images of Li anode utilizing (a) ZnSe-CoSe<sub>2</sub>@NC/S and (b) ZnSe@NC/S electrodes after cycling. High-resolution S 2p XPS spectra of Li anode employing (c) ZnSe-CoSe<sub>2</sub>@NC/S and (d) ZnSe@NC/S electrodes after cycling.

**Table S1.** Comparative analysis of the electrochemical properties of recently reported host materials for SSLSBs.

| S-cathode components              | Composite solid-state electrolytes                                  | $T / ^\circ\text{C}$ | Current density              | Initial capacity ( $\text{mAh g}^{-1}$ ) | Cycle number            | Retention rate / %         | Sulfur loading / $\text{mg cm}^{-2}$ | Ref.             |
|-----------------------------------|---------------------------------------------------------------------|----------------------|------------------------------|------------------------------------------|-------------------------|----------------------------|--------------------------------------|------------------|
| KB@S/PEO-LiTFSI                   | PEO/LiTFSI/MIL-125-NH <sub>2</sub>                                  | 60                   | 0.1 C                        | 741                                      | 50                      | 94.8                       | 0.5-1                                | 1                |
| S/KB                              | PEO-LiTFSI-LLZTO                                                    | 60                   | 0.2 C                        | 833                                      | 50                      | 95.9                       | 0.5                                  | 2                |
| S@C                               | PEO-PIM                                                             | 60                   | 0.2 C                        | 1181                                     | 100                     | 61.8                       | 1                                    | 3                |
| PVDF-Coated Sulfur                | PEO/PTFE/LiTFSI                                                     | 55                   | 0.03 C                       | 818                                      | 60                      | 77                         | 1-2                                  | 4                |
| S/C                               | PEO-LiTFSI-LLZTO-acetamide                                          | 60                   | 0.1 C                        | 980                                      | 100                     | 61.2                       | 0.7-0.9                              | 5                |
| S/KB                              | TFSI-QACC/PEO                                                       | 60                   | 0.1 C                        | 1191.1                                   | 100                     | 59                         | 0.5                                  | 6                |
| S/C                               | PEO-LiTFSI-Py <sub>13</sub> TFSI-PGA-Al <sub>2</sub> O <sub>3</sub> | 50                   | 0.2 C                        | 607.9                                    | 100                     | 89                         | 1.5                                  | 7                |
| SPAN                              | PVDF-HFP-LiFSI                                                      | 25                   | 0.2 C                        | 1325                                     | 100                     | 67.7                       | 0.5-1                                | 8                |
| <b>ZnSe-CoSe<sub>2</sub>@NC/S</b> | <b>PVDF-LiTFSI-LLZTO</b>                                            | <b>30</b>            | <b>0.2 C</b><br><b>0.5 C</b> | <b>1016</b><br><b>766</b>                | <b>80</b><br><b>100</b> | <b>60.6</b><br><b>65.7</b> | <b>0.75-1</b>                        | <b>This work</b> |

## Reference

1. J. Li, F. Xie, W. Pang, Q. Liang, X. Yang and L. Zhang, Regulate transportation of ions and polysulfides in all-solid-state Li-S batteries using ordered-MOF composite solid electrolyte, *Sci. Adv.*, 2024, **10**, ead13925.
2. Y. Liu, H. Liu, Y. Lin, Y. Zhao, H. Yuan, Y. Su, J. Zhang, S. Ren, H. Fan and Y. Zhang, Mechanistic Investigation of Polymer-Based All-Solid-State Lithium/Sulfur Battery, *Adv. Funct. Mater.*, 2021, **31**, 2104863.
3. Y. Ji, K. Yang, M. Liu, S. Chen, X. Liu, B. Yang, Z. Wang, W. Huang, Z. Song, S. Xue, Y. Fu, L. Yang, T. S. Miller and F. Pan, PIM-1 as a Multifunctional Framework to Enable High-Performance Solid-State Lithium–Sulfur Batteries, *Adv. Funct. Mater.*, 2021, **31**, 2104830.
4. R. Fang, H. Xu, B. Xu, X. Li, Y. Li and J. B. Goodenough, Reaction Mechanism Optimization of Solid-State Li–S Batteries with a PEO-Based Electrolyte, *Adv. Funct. Mater.*, 2021, **31**, 2001812.
5. M. Li, Z. Huang, Y. Liang, Z. Wu, H. Zhang, H. Chen and S. Zhang, Accelerating Lithium-Ion Transfer and Sulfur Conversion via Electrolyte Engineering for Ultra-Stable All-Solid-State Lithium–Sulfur Batteries, *Adv. Funct. Mater.*, 2025, **35**, 2413580.
6. C. Ji, S. Wu, F. Tang, Y. Yu, F. Hung and Q. Wei, Cationic cellulose nanofiber solid electrolytes: A pathway to high lithium-ion migration and polysulfide adsorption for lithium-sulfur batteries, *Carbohydr. Polym.*, 2024, **335**, 122075.
7. J. Li, H. Zhang, Y. Cui, H. Da, H. Wu, Y. Cai and S. Zhang, Constructing robust cathode/Li interfaces and intensifying ion transport kinetics for PEO-based solid-state lithium-sulfur batteries, *Chem. Eng. J.*, 2023, **454**, 140385.
8. C. Li, Q. Zhang, J. Sheng, B. Chen, R. Gao, Z. Piao, X. Zhong, Z. Han, Y. Zhu, J. Wang, G. Zhou and H.-M. Cheng, A quasi-intercalation reaction for fast sulfur redox kinetics in solid-state lithium–sulfur batteries, *Energy Environ. Sci.*, 2022, **15**, 4289-4300.
